# Supplementary material for: Draft Genome of a Blister Beetle Mylabris aulica
Source: Front Genet. 2020 Jan 8;10:1281. doi: 10.3389/fgene.2019.01281 (PMC6972506; doi:10.3389/fgene.2019.01281)
Supplement: Supplementary file 5 [file Table_5.xlsx]

## Sheet: Supplement file 5
The genes of the significantly expanded gene families
OG0000004	BMGene02541, BMGene02542, BMGene02544, BMGene02545, BMGene02546, BMGene02549, BMGene02553, BMGene03013, BMGene03442, BMGene03572, BMGene03574, BMGene03575, BMGene03577, BMGene03578, BMGene03579, BMGene03580, BMGene03581, BMGene03582, BMGene03585, BMGene03586, BMGene03587, BMGene13078, BMGene15394, BMGene15395
OG0000006	BMGene05061, BMGene09196, BMGene09203, BMGene11448, BMGene11809, BMGene11849, BMGene11861, BMGene11894, BMGene12324, BMGene12424, BMGene12429, BMGene12542, BMGene12548, BMGene12567, BMGene12713, BMGene12716, BMGene12763, BMGene12768, BMGene12931, BMGene12954, BMGene12998, BMGene13411, BMGene13513, BMGene13565, BMGene13625, BMGene13659, BMGene13796, BMGene13872, BMGene14052, BMGene14132, BMGene142…
OG0000008	BMGene02550, BMGene03573, BMGene09168, BMGene09207, BMGene12332, BMGene12365, BMGene12682, BMGene12684, BMGene12779, BMGene12874, BMGene13208, BMGene13404, BMGene13552, BMGene13755, BMGene13786, BMGene13843, BMGene13848, BMGene13857, BMGene14049, BMGene14073, BMGene14104, BMGene14105, BMGene14338, BMGene14490, BMGene14502, BMGene14518, BMGene14610, BMGene14612, BMGene14613, BMGene14614, BMGene146…
OG0000009	BMGene01365, BMGene01366, BMGene02453, BMGene02543, BMGene02548, BMGene03576, BMGene03583, BMGene03584, BMGene03626, BMGene03644, BMGene03646, BMGene05056, BMGene08245, BMGene09186, BMGene09204, BMGene09215, BMGene11576, BMGene11579, BMGene11593, BMGene11640, BMGene11644, BMGene11876, BMGene11882, BMGene11903, BMGene12311, BMGene12376, BMGene12743, BMGene12792, BMGene12807, BMGene13069, BMGene130…
OG0000010	BMGene07005, BMGene11469, BMGene11604, BMGene12229, BMGene12310, BMGene12317, BMGene12355, BMGene12536, BMGene12546, BMGene12559, BMGene12765, BMGene12774, BMGene12811, BMGene12849, BMGene12912, BMGene13051, BMGene13522, BMGene13582, BMGene13731, BMGene13803, BMGene13824, BMGene14045, BMGene14058, BMGene14220, BMGene14228, BMGene14420, BMGene14621, BMGene14757, BMGene14845, BMGene14848, BMGene149…
OG0000011	BMGene01865, BMGene01874, BMGene01881, BMGene01891, BMGene03413
OG0000013	BMGene03705, BMGene03750, BMGene03751, BMGene03996, BMGene03998, BMGene04012, BMGene04014, BMGene05582, BMGene05859, BMGene06385, BMGene06716, BMGene06717, BMGene07092, BMGene07097, BMGene07178, BMGene07517, BMGene08288, BMGene10767, BMGene10769, BMGene10770, BMGene11072, BMGene11952, BMGene12465, BMGene12890, BMGene12893, BMGene14670, BMGene15433, BMGene15434
OG0000014	BMGene01322, BMGene02514, BMGene02515, BMGene05744, BMGene06930, BMGene09174, BMGene09194, BMGene09198, BMGene11471, BMGene11888, BMGene12283, BMGene12501, BMGene12564, BMGene12697, BMGene12803, BMGene12875, BMGene12925, BMGene13177, BMGene13365, BMGene13378, BMGene13521, BMGene13528, BMGene13672, BMGene13734, BMGene13902, BMGene13968, BMGene14084, BMGene14296, BMGene14719, BMGene14768, BMGene150…
OG0000015	BMGene01875, BMGene01876, BMGene01877, BMGene01878, BMGene01879, BMGene01880, BMGene01890, BMGene06470, BMGene10829, BMGene10836
OG0000016	BMGene08727, BMGene08728, BMGene08729, BMGene08730
OG0000018	BMGene04459, BMGene04680, BMGene04681, BMGene04682, BMGene04683, BMGene04684, BMGene04685, BMGene05147, BMGene05186, BMGene05207, BMGene06299, BMGene08093, BMGene08122, BMGene08157, BMGene08159
OG0000019	BMGene02499, BMGene04270, BMGene09145, BMGene10775, BMGene11828, BMGene11964, BMGene12183, BMGene12252, BMGene12266, BMGene12303, BMGene12356, BMGene12422, BMGene12471, BMGene12484, BMGene12543, BMGene12818, BMGene12847, BMGene12887, BMGene12970, BMGene12972, BMGene12988, BMGene13114, BMGene13511, BMGene13537, BMGene13550, BMGene13598, BMGene13621, BMGene13965, BMGene13990, BMGene14002, BMGene143…
OG0000021	BMGene06921, BMGene06922
OG0000022	BMGene01757, BMGene02599, BMGene06390, BMGene09140, BMGene09176, BMGene09216, BMGene09217, BMGene10989, BMGene11470, BMGene11575, BMGene11791, BMGene11880, BMGene12347, BMGene12570, BMGene12775, BMGene12982, BMGene13127, BMGene13223, BMGene13246, BMGene13297, BMGene13737, BMGene13756, BMGene13818, BMGene13869, BMGene13871, BMGene14300, BMGene14369, BMGene14396, BMGene14679, BMGene14880, BMGene149…
OG0000023	BMGene00576, BMGene01951, BMGene02305, BMGene05388, BMGene05539, BMGene12512, BMGene12609, BMGene12658, BMGene12796, BMGene13604, BMGene13630, BMGene13691, BMGene14082, BMGene15153, BMGene15979, BMGene16295
OG0000026	BMGene01347, BMGene01722, BMGene01738, BMGene02505, BMGene03650, BMGene09163, BMGene11691, BMGene11846, BMGene12202, BMGene12339, BMGene12358, BMGene12634, BMGene12677, BMGene12800, BMGene13235, BMGene13409, BMGene13415, BMGene13827, BMGene13863, BMGene14316, BMGene14335, BMGene14365, BMGene14492, BMGene14620, BMGene14747, BMGene14758, BMGene14875, BMGene14897, BMGene15089, BMGene15529, BMGene155…
OG0000027	BMGene06544
OG0000028	BMGene03702, BMGene03852, BMGene07053, BMGene12539, BMGene12550, BMGene12558, BMGene12773, BMGene13131, BMGene13763, BMGene13806, BMGene13908, BMGene13938, BMGene13939, BMGene13978, BMGene14294, BMGene14388, BMGene14619, BMGene14839, BMGene14881, BMGene14889, BMGene14934, BMGene15157, BMGene15291, BMGene15649, BMGene15706, BMGene15876
OG0000029	BMGene03629, BMGene06682, BMGene07185, BMGene07633, BMGene07634, BMGene07635, BMGene07638, BMGene07640, BMGene07641, BMGene07643, BMGene07675, BMGene07676, BMGene07733, BMGene07734, BMGene07735, BMGene12722
OG0000030	BMGene03112
OG0000031	BMGene01164, BMGene01719, BMGene01730, BMGene01731, BMGene02512, BMGene02513, BMGene03645, BMGene03753, BMGene04346, BMGene06376, BMGene07957, BMGene11618, BMGene11830, BMGene12225, BMGene12340, BMGene12387, BMGene12703, BMGene12822, BMGene13043, BMGene13218, BMGene13837, BMGene13838, BMGene13892, BMGene14160, BMGene14222, BMGene14374, BMGene14445, BMGene14446, BMGene14546, BMGene14548, BMGene145…
OG0000032	BMGene03241, BMGene03300, BMGene03331
OG0000033	BMGene05880, BMGene05881, BMGene05882, BMGene05883, BMGene05884, BMGene05885, BMGene05886, BMGene05887, BMGene05888, BMGene06072
OG0000034
OG0000036	BMGene03084, BMGene04429, BMGene12538, BMGene13012, BMGene13312, BMGene13527, BMGene13733, BMGene13775, BMGene14137, BMGene14249, BMGene14390, BMGene15111, BMGene15159, BMGene15493
OG0000039	BMGene04352, BMGene05816, BMGene06887
OG0000040	BMGene06382, BMGene10900, BMGene10901, BMGene10902, BMGene10903, BMGene11046, BMGene11047, BMGene11108, BMGene12281, BMGene16250
OG0000042	BMGene00573, BMGene01227, BMGene08335, BMGene11937, BMGene12315, BMGene14066, BMGene14507
OG0000043	BMGene07341, BMGene08875, BMGene08876
OG0000045	BMGene02059, BMGene08849
OG0000046	BMGene01697, BMGene01698, BMGene01991, BMGene01992, BMGene02484, BMGene04097, BMGene05581
OG0000048	BMGene02575, BMGene11822, BMGene11847, BMGene12320, BMGene12742, BMGene13525, BMGene13751, BMGene13886, BMGene14008, BMGene14077, BMGene14194, BMGene14333, BMGene14401
OG0000049	BMGene00011, BMGene00194, BMGene00195, BMGene00196, BMGene00197, BMGene00604, BMGene00817, BMGene00818, BMGene00819, BMGene00820, BMGene00821, BMGene00822, BMGene00823, BMGene01249, BMGene03472, BMGene09033
OG0000050	BMGene01454, BMGene01455, BMGene02227, BMGene02228, BMGene02229, BMGene02230, BMGene07663
OG0000051	BMGene01316, BMGene01394, BMGene02162, BMGene03006, BMGene04269, BMGene06033, BMGene11892, BMGene12500, BMGene12577, BMGene12585, BMGene12602, BMGene12694, BMGene12711, BMGene12741, BMGene12952, BMGene13401, BMGene13885, BMGene14076, BMGene14193, BMGene14334, BMGene14500, BMGene14572, BMGene15597, BMGene15687, BMGene16023, BMGene16053
OG0000053	BMGene09157, BMGene11687, BMGene11751, BMGene12805, BMGene13000, BMGene13061, BMGene13167, BMGene13176, BMGene13364, BMGene13384, BMGene13515, BMGene13526, BMGene13578, BMGene13735, BMGene14150, BMGene14346, BMGene15001, BMGene15048, BMGene15404, BMGene15449, BMGene15478, BMGene15655, BMGene15808, BMGene15839
OG0000054	BMGene09167, BMGene09206, BMGene11769, BMGene12236, BMGene12372, BMGene12373, BMGene12685, BMGene12686, BMGene12687, BMGene12873, BMGene13019, BMGene13792, BMGene13993, BMGene14048, BMGene14101, BMGene14103, BMGene14357, BMGene14520, BMGene14568, BMGene14611, BMGene14635, BMGene14657, BMGene14732, BMGene15132, BMGene15272, BMGene15287, BMGene16041, BMGene16206
OG0000056	BMGene01659, BMGene01937, BMGene01938, BMGene02448, BMGene03866, BMGene03867, BMGene03868, BMGene04254, BMGene05339, BMGene07949, BMGene10789, BMGene10882, BMGene10910, BMGene11109, BMGene11301, BMGene11487, BMGene11760, BMGene12600, BMGene13136, BMGene14788
OG0000057	BMGene04662, BMGene09175, BMGene11763, BMGene11898, BMGene11907, BMGene12232, BMGene12359, BMGene12530, BMGene12691, BMGene12785, BMGene13064, BMGene13162, BMGene13230, BMGene13570, BMGene13640, BMGene13783, BMGene13861, BMGene13901, BMGene13934, BMGene14808, BMGene15830, BMGene15959, BMGene16054, BMGene16279
OG0000058	BMGene03056, BMGene11615, BMGene11956, BMGene12195, BMGene12241, BMGene12490, BMGene12518, BMGene12662, BMGene12663, BMGene12868, BMGene12964, BMGene13021, BMGene13022, BMGene13041, BMGene13042, BMGene13424, BMGene13546, BMGene13665, BMGene13716, BMGene13739, BMGene13740, BMGene13821, BMGene13927, BMGene13960, BMGene13985, BMGene13998, BMGene14347, BMGene14567, BMGene14583, BMGene14981, BMGene150…
OG0000062	BMGene00354, BMGene01346, BMGene10659, BMGene10660, BMGene11810, BMGene12707, BMGene13668, BMGene14737, BMGene15334, BMGene15524, BMGene16198
OG0000064	BMGene02918, BMGene02919
OG0000068	BMGene01343, BMGene02516, BMGene09158, BMGene09213, BMGene11638, BMGene11639, BMGene11667, BMGene11672, BMGene11705, BMGene11968, BMGene11969, BMGene12352, BMGene12486, BMGene13272, BMGene13348, BMGene13799, BMGene13962, BMGene14363, BMGene14440, BMGene14543, BMGene14600, BMGene14708, BMGene14878, BMGene14928, BMGene15386, BMGene15462, BMGene15464, BMGene15582, BMGene15712, BMGene15732, BMGene158…
OG0000070	BMGene04355, BMGene09101, BMGene13242, BMGene15082, BMGene15086, BMGene16221
OG0000071	BMGene06369, BMGene09153, BMGene12313, BMGene13357, BMGene13677, BMGene14290, BMGene14716, BMGene15378, BMGene15453, BMGene15651
OG0000073	BMGene01712, BMGene02500, BMGene11460, BMGene11563, BMGene11664, BMGene11697, BMGene12184, BMGene12189, BMGene12273, BMGene12357, BMGene12483, BMGene12727, BMGene12848, BMGene12860, BMGene12921, BMGene12969, BMGene12973, BMGene12987, BMGene13420, BMGene13532, BMGene13619, BMGene13656, BMGene14086, BMGene14097, BMGene14266, BMGene14292, BMGene14303, BMGene14354, BMGene14570, BMGene14765, BMGene148…
OG0000074	BMGene04333, BMGene05800, BMGene08937, BMGene08940, BMGene08942, BMGene08947, BMGene10576, BMGene10629, BMGene10655, BMGene12638, BMGene12643, BMGene14464, BMGene14466, BMGene14471, BMGene14481, BMGene15427, BMGene15430, BMGene15747, BMGene15908, BMGene16017, BMGene16018, BMGene16019
OG0000075	BMGene10542, BMGene10546, BMGene15061
OG0000077	BMGene11601, BMGene11602, BMGene12186, BMGene13713, BMGene14230, BMGene14366, BMGene15562
OG0000082	BMGene03641, BMGene10947, BMGene11641, BMGene11776, BMGene12351, BMGene12551, BMGene12709, BMGene12844, BMGene12962, BMGene12981, BMGene13046, BMGene13281, BMGene13391, BMGene13564, BMGene13580, BMGene13591, BMGene13771, BMGene13850, BMGene13877, BMGene13924, BMGene13983, BMGene14386, BMGene14403, BMGene14438, BMGene14714, BMGene14750, BMGene14835, BMGene15026, BMGene15106, BMGene15177, BMGene151…
OG0000084	BMGene04555, BMGene08151
OG0000085	BMGene08197, BMGene11614, BMGene11630, BMGene11631, BMGene11658, BMGene11661, BMGene11669, BMGene12167, BMGene12172, BMGene12181, BMGene12196, BMGene12250, BMGene12251, BMGene12254, BMGene12519, BMGene12552, BMGene12669, BMGene12712, BMGene12780, BMGene12867, BMGene12879, BMGene12963, BMGene13020, BMGene13049, BMGene13266, BMGene13321, BMGene13322, BMGene13323, BMGene13369, BMGene13542, BMGene135…
OG0000090	BMGene03651, BMGene07008, BMGene12354, BMGene12411, BMGene13276, BMGene13517, BMGene13573, BMGene13629, BMGene13866, BMGene14246, BMGene14323, BMGene14599, BMGene14996, BMGene15834, BMGene16110, BMGene16141
OG0000096	BMGene08946, BMGene11812, BMGene11866, BMGene11900, BMGene11909, BMGene12237, BMGene12306, BMGene12309, BMGene12476, BMGene12477, BMGene12556, BMGene12692, BMGene12710, BMGene12830, BMGene12882, BMGene13059, BMGene13065, BMGene13077, BMGene13081, BMGene13205, BMGene13215, BMGene13287, BMGene13291, BMGene13345, BMGene13599, BMGene13626, BMGene13805, BMGene14056, BMGene14113, BMGene14198, BMGene142…
OG0000098	BMGene06665, BMGene06669, BMGene06670
OG0000103	BMGene01709, BMGene01740, BMGene01741, BMGene02497, BMGene02536, BMGene06393, BMGene09193, BMGene12316, BMGene13309, BMGene14028, BMGene14722, BMGene14746, BMGene14906, BMGene15294, BMGene15359, BMGene15774
OG0000105	BMGene09024
OG0000110	BMGene01727, BMGene01728, BMGene02506, BMGene09187, BMGene11461, BMGene11678, BMGene12380, BMGene12428, BMGene12938, BMGene13088, BMGene13128, BMGene13593, BMGene13899, BMGene14153, BMGene14221, BMGene14297, BMGene14456, BMGene15058, BMGene15093, BMGene15501, BMGene15644, BMGene15645, BMGene15835, BMGene16058
OG0000112	BMGene01324, BMGene01332, BMGene09029, BMGene11789, BMGene11821, BMGene12299, BMGene12813, BMGene12983, BMGene13070, BMGene13648, BMGene14806, BMGene15476, BMGene16135
OG0000114	BMGene03366
OG0000116	BMGene11501
OG0000118	BMGene01496, BMGene02271, BMGene12207, BMGene12208, BMGene12704, BMGene14212
OG0000120	BMGene01297, BMGene01319, BMGene01325, BMGene02317, BMGene02318, BMGene02433, BMGene02489, BMGene03616, BMGene09200, BMGene11567, BMGene11578, BMGene11591, BMGene11659, BMGene11889, BMGene11942, BMGene11953, BMGene12206, BMGene12263, BMGene12363, BMGene12506, BMGene12814, BMGene12827, BMGene12851, BMGene12863, BMGene12880, BMGene13035, BMGene13256, BMGene13257, BMGene13259, BMGene13541, BMGene135…
OG0000121	BMGene03206, BMGene03208
OG0000124	BMGene11774, BMGene12304, BMGene12325, BMGene12382, BMGene12510, BMGene12653, BMGene12828, BMGene13403, BMGene13597, BMGene13789, BMGene13916, BMGene14089, BMGene14486, BMGene14535, BMGene14589, BMGene14664, BMGene14763, BMGene15067, BMGene15351, BMGene15466, BMGene15755, BMGene15757, BMGene15849, BMGene15862, BMGene16230
OG0000125	BMGene11673, BMGene12276, BMGene12681, BMGene12715, BMGene12744, BMGene13056, BMGene13087, BMGene13194, BMGene13325, BMGene13747, BMGene13768, BMGene13889, BMGene13917, BMGene13918, BMGene13919, BMGene14036, BMGene14110, BMGene14330, BMGene14371, BMGene14529, BMGene14586, BMGene14704, BMGene14705, BMGene14707, BMGene14854, BMGene14988, BMGene15083, BMGene15116, BMGene15195, BMGene15197, BMGene153…
OG0000126	BMGene11473, BMGene11686, BMGene12584, BMGene13164, BMGene13376, BMGene13433, BMGene13637, BMGene13875, BMGene13923, BMGene14155, BMGene14163, BMGene14378, BMGene14447, BMGene14448, BMGene14715, BMGene14812, BMGene14940, BMGene15203, BMGene15243, BMGene15402, BMGene15447, BMGene15450, BMGene15738
OG0000131	BMGene00975, BMGene03228, BMGene07378, BMGene09137, BMGene09177, BMGene09181, BMGene09201, BMGene11610, BMGene11817, BMGene11871, BMGene11912, BMGene12337, BMGene12671, BMGene12689, BMGene12690, BMGene12821, BMGene13097, BMGene13229, BMGene13283, BMGene13303, BMGene13551, BMGene14029, BMGene14087, BMGene14227, BMGene14248, BMGene14450, BMGene15120, BMGene15235, BMGene15318, BMGene15711, BMGene158…
OG0000135	BMGene01502, BMGene01503, BMGene01516, BMGene01679, BMGene01683, BMGene01684, BMGene02280, BMGene02296, BMGene02469, BMGene02474, BMGene12613
OG0000140	BMGene03051, BMGene03052
OG0000144	BMGene01108, BMGene01689, BMGene01724, BMGene02410, BMGene02480, BMGene02557, BMGene03591, BMGene03592, BMGene03754, BMGene04327, BMGene04347, BMGene06582, BMGene09130, BMGene09173, BMGene12831, BMGene12974, BMGene13277, BMGene14432, BMGene14837, BMGene14908, BMGene15642, BMGene15672
OG0000146	BMGene01331, BMGene01721, BMGene02817, BMGene09155, BMGene09202, BMGene10945, BMGene11796, BMGene11851, BMGene12950, BMGene12980, BMGene13516, BMGene13914, BMGene14157, BMGene14211, BMGene14385, BMGene14752, BMGene15027, BMGene15053, BMGene15114, BMGene15241, BMGene15602, BMGene15806, BMGene15870
OG0000151	BMGene03150
OG0000154	BMGene04064, BMGene05921, BMGene12217, BMGene12612, BMGene15444, BMGene15783
OG0000155	BMGene01320, BMGene01744, BMGene03634, BMGene03997, BMGene07010, BMGene07433, BMGene09218, BMGene11634, BMGene11654, BMGene11805, BMGene11859, BMGene11874, BMGene11896, BMGene11897, BMGene12177, BMGene12349, BMGene12391, BMGene12664, BMGene12674, BMGene12679, BMGene12706, BMGene12754, BMGene12832, BMGene12870, BMGene12883, BMGene13383, BMGene13661, BMGene13671, BMGene13729, BMGene13816, BMGene138…
OG0000156	BMGene04484, BMGene04485, BMGene04486, BMGene04487, BMGene06323, BMGene06324, BMGene07294
OG0000162	BMGene01338, BMGene01701, BMGene01702, BMGene01962, BMGene02490, BMGene06966, BMGene07854, BMGene09156, BMGene11588, BMGene11594, BMGene11839, BMGene12261, BMGene12284, BMGene12292, BMGene13228, BMGene13324, BMGene13583, BMGene13717, BMGene13855, BMGene14247, BMGene14343, BMGene14457, BMGene14565, BMGene14931, BMGene15071, BMGene15080, BMGene15161, BMGene15418, BMGene15749, BMGene15861, BMGene158…
OG0000165	BMGene00102, BMGene01636, BMGene02306, BMGene02419, BMGene03636, BMGene03640, BMGene04357, BMGene07374, BMGene07406, BMGene10777, BMGene11649, BMGene11707, BMGene11829, BMGene12293, BMGene12463, BMGene12583, BMGene12904, BMGene12956, BMGene13023, BMGene13298, BMGene13412, BMGene13531, BMGene13685, BMGene13690, BMGene13832, BMGene13854, BMGene14141, BMGene14151, BMGene14161, BMGene14285, BMGene146…
OG0000168	BMGene01718, BMGene09147, BMGene11465, BMGene11682, BMGene11794, BMGene11885, BMGene12239, BMGene12318, BMGene13191, BMGene13377, BMGene13431, BMGene13980, BMGene14485, BMGene14516, BMGene14672, BMGene14900, BMGene15012, BMGene15208, BMGene15437, BMGene15669, BMGene15904
OG0000171	BMGene05243, BMGene08053
OG0000173	BMGene01620, BMGene01861, BMGene02401, BMGene08945, BMGene10632, BMGene10652, BMGene12641, BMGene12646, BMGene12648, BMGene14465, BMGene14473, BMGene14478, BMGene16015
OG0000175	BMGene01971, BMGene03655, BMGene07013, BMGene12515, BMGene12927, BMGene13163, BMGene13351, BMGene13707, BMGene14167, BMGene14745, BMGene14755, BMGene14930, BMGene15011, BMGene15090, BMGene15600, BMGene15975, BMGene16056
OG0000179	BMGene00344, BMGene00345, BMGene00346, BMGene00347, BMGene00971, BMGene00972, BMGene00973, BMGene00974
OG0000191	BMGene03057, BMGene11456, BMGene11653, BMGene11815, BMGene11868, BMGene11869, BMGene12166, BMGene12170, BMGene12180, BMGene12242, BMGene12246, BMGene12247, BMGene12693, BMGene13076, BMGene13212, BMGene13329, BMGene13340, BMGene13681, BMGene14181, BMGene14584, BMGene14634, BMGene15055, BMGene15056, BMGene15057, BMGene15148, BMGene15331, BMGene15347, BMGene15426, BMGene15593, BMGene16005
OG0000196	BMGene01714, BMGene11459, BMGene12343, BMGene12344, BMGene12379, BMGene13188, BMGene13655, BMGene13701, BMGene14267, BMGene14269, BMGene14321, BMGene14356, BMGene14515, BMGene14626, BMGene14690, BMGene14742, BMGene14764, BMGene14903, BMGene15041, BMGene15239, BMGene15379, BMGene15456, BMGene15468, BMGene15665, BMGene16012, BMGene16130, BMGene16228, BMGene16229, BMGene16246, BMGene16284
OG0000208	BMGene01733, BMGene03633, BMGene05741, BMGene11616, BMGene11780, BMGene12193, BMGene12491, BMGene12507, BMGene13385, BMGene13410, BMGene13413, BMGene13553, BMGene13683, BMGene13684, BMGene13804, BMGene14098, BMGene14340, BMGene14493, BMGene15150, BMGene16115
OG0000209	BMGene03999, BMGene09190, BMGene11671, BMGene11902, BMGene12361, BMGene12537, BMGene12753, BMGene13125, BMGene14219, BMGene14314, BMGene14678, BMGene15018, BMGene15158, BMGene15292, BMGene15511
OG0000211	BMGene04362, BMGene04363, BMGene06199, BMGene06200, BMGene06201, BMGene06202
OG0000223	BMGene04265, BMGene05733
OG0000228	BMGene03952, BMGene06983
OG0000229	BMGene04413, BMGene06254
OG0000230	BMGene08794, BMGene08939, BMGene08941, BMGene08951, BMGene10633, BMGene10651, BMGene12164, BMGene12637, BMGene12642, BMGene12649, BMGene14458, BMGene14462, BMGene14477, BMGene15340, BMGene15428, BMGene15746, BMGene15748, BMGene15906, BMGene16097
OG0000237	BMGene01600, BMGene02381
OG0000241	BMGene12521, BMGene12793, BMGene15180, BMGene15668, BMGene15696
OG0000242	BMGene00720, BMGene00849, BMGene01085, BMGene01086, BMGene03942, BMGene04244, BMGene04372, BMGene05734, BMGene06212, BMGene07601, BMGene07897, BMGene07973, BMGene07974, BMGene11698, BMGene11914, BMGene12169, BMGene12238, BMGene12856, BMGene13008, BMGene13037, BMGene13082, BMGene13113, BMGene13361, BMGene13675, BMGene13828, BMGene13829, BMGene13895, BMGene13933, BMGene14231, BMGene14384, BMGene144…
OG0000248	BMGene10992, BMGene12902
OG0000250	BMGene01381, BMGene02142, BMGene02284, BMGene07791, BMGene16050
OG0000255	BMGene00307, BMGene01614, BMGene03642, BMGene05794, BMGene07430, BMGene13130, BMGene15398, BMGene15807, BMGene15832, BMGene15896
OG0000256	BMGene11564, BMGene11628, BMGene11792, BMGene11793, BMGene11881, BMGene12212, BMGene12213, BMGene12228, BMGene12286, BMGene12397, BMGene12478, BMGene12479, BMGene12480, BMGene12804, BMGene13240, BMGene13835, BMGene14262, BMGene14282, BMGene14318, BMGene14325, BMGene14467, BMGene14559, BMGene14587, BMGene14760, BMGene14772, BMGene15076, BMGene15079, BMGene15175, BMGene15196, BMGene15209, BMGene152…
OG0000260	BMGene15556
OG0000267	BMGene08943, BMGene08948, BMGene10630, BMGene10654, BMGene12639, BMGene12644, BMGene14459, BMGene14461, BMGene14463, BMGene14470, BMGene14475, BMGene15429, BMGene16016
OG0000270	BMGene00738, BMGene01357, BMGene03034, BMGene07883, BMGene09136, BMGene11683, BMGene12502, BMGene13207, BMGene13274, BMGene13574, BMGene13761, BMGene13773, BMGene14196, BMGene14563, BMGene14743, BMGene14887, BMGene15242, BMGene16171
OG0000272	BMGene03015, BMGene11800, BMGene11814, BMGene12430, BMGene12547, BMGene13044, BMGene13279, BMGene13423, BMGene13617, BMGene13776, BMGene13852, BMGene14389, BMGene15204, BMGene15338, BMGene15619, BMGene15670
OG0000274	BMGene14519, BMGene15273
OG0000275	BMGene11568, BMGene12392, BMGene12531, BMGene12945, BMGene12990, BMGene13203, BMGene13299, BMGene13745, BMGene14083, BMGene14108, BMGene14199, BMGene14524, BMGene14699, BMGene14849, BMGene15190, BMGene16149
OG0000276	BMGene03637, BMGene03638, BMGene04013, BMGene11617, BMGene11636, BMGene12334, BMGene12745, BMGene12837, BMGene13302, BMGene13371, BMGene14217, BMGene14607, BMGene15284, BMGene15720, BMGene15888
OG0000279
OG0000280	BMGene05045, BMGene05046, BMGene08253, BMGene08254
OG0000282	BMGene03229, BMGene06389, BMGene06434, BMGene11559, BMGene11606, BMGene12327, BMGene12470, BMGene12504, BMGene12919, BMGene13315, BMGene13946, BMGene14574, BMGene14623, BMGene14777, BMGene14919, BMGene15277, BMGene16061, BMGene16113, BMGene16114
OG0000284	BMGene11904, BMGene12348, BMGene12562, BMGene12700, BMGene13359, BMGene15099, BMGene15667, BMGene15683
OG0000285	BMGene02518, BMGene03653, BMGene07011, BMGene12492, BMGene13024, BMGene14117
OG0000286	BMGene00051, BMGene01682, BMGene02472, BMGene02689, BMGene03829, BMGene09138, BMGene09144, BMGene11093, BMGene12553, BMGene12965, BMGene14264, BMGene14326, BMGene14424, BMGene14759, BMGene14898, BMGene14907, BMGene15303, BMGene15930, BMGene16072
OG0000287	BMGene11467, BMGene11913, BMGene12757, BMGene13226, BMGene14945, BMGene15606
OG0000299	BMGene02501, BMGene04813, BMGene05738, BMGene06032, BMGene11587, BMGene11676, BMGene12230, BMGene12342, BMGene12345, BMGene13083, BMGene13398, BMGene13654, BMGene14061, BMGene14513, BMGene14627, BMGene14784, BMGene14858, BMGene15040, BMGene15507, BMGene16244, BMGene16245
OG0000308	BMGene01667, BMGene02459
OG0000315
OG0000324	BMGene11049, BMGene11050, BMGene12215, BMGene12216, BMGene14032, BMGene14033, BMGene14603, BMGene14767, BMGene14818, BMGene14819, BMGene15117, BMGene15118, BMGene15504, BMGene15725, BMGene15980
OG0000340	BMGene01666, BMGene02458
OG0000343	BMGene09199, BMGene12406, BMGene12407, BMGene12652, BMGene12878, BMGene13126, BMGene13179, BMGene13224, BMGene13292, BMGene13304, BMGene13741, BMGene13942, BMGene14009, BMGene14397, BMGene14541, BMGene14860, BMGene14864, BMGene15850, BMGene16004, BMGene16109
OG0000344	BMGene09161, BMGene10772, BMGene11637, BMGene11824, BMGene12312, BMGene13270, BMGene13271, BMGene13370, BMGene13666, BMGene13736, BMGene13931, BMGene14140, BMGene14226, BMGene15652
OG0000348	BMGene01736, BMGene02511, BMGene07015, BMGene11572, BMGene11887, BMGene12473, BMGene12806, BMGene12941, BMGene14387, BMGene14398, BMGene14799, BMGene15015, BMGene15107, BMGene15584, BMGene15707, BMGene15714
OG0000352	BMGene12511
OG0000355	BMGene11929, BMGene11930
OG0000375	BMGene04356, BMGene04358, BMGene06194, BMGene11961, BMGene13243, BMGene14010, BMGene14180, BMGene14261, BMGene15060, BMGene15510, BMGene16199, BMGene16200
OG0000387	BMGene07289
OG0000389	BMGene11787, BMGene11877, BMGene12426, BMGene14210, BMGene14902, BMGene15480, BMGene16176
OG0000393	BMGene04671
OG0000399
OG0000402	BMGene03623, BMGene11700, BMGene12366, BMGene12840, BMGene13124, BMGene13334, BMGene13523, BMGene13778, BMGene13820, BMGene14115, BMGene14308, BMGene14427
OG0000403	BMGene04814, BMGene11452, BMGene11696, BMGene12305, BMGene12383, BMGene12416, BMGene12759, BMGene12766, BMGene12845, BMGene13392, BMGene13742, BMGene14291, BMGene14302, BMGene14320, BMGene14537, BMGene14588, BMGene14951, BMGene15308, BMGene15356, BMGene15758, BMGene15864
OG0000409	BMGene04253, BMGene05722
OG0000411	BMGene05879
OG0000414
OG0000419	BMGene01569, BMGene02353
OG0000422	BMGene01720, BMGene01737, BMGene02504, BMGene10768, BMGene11651, BMGene11890, BMGene12165, BMGene12647, BMGene12999, BMGene13175, BMGene13586, BMGene14718, BMGene15230, BMGene15431, BMGene16014
OG0000429	BMGene11612, BMGene12493, BMGene12683, BMGene12748, BMGene12749, BMGene12750, BMGene12862, BMGene12929, BMGene12955, BMGene13009, BMGene13026, BMGene13183, BMGene13184, BMGene13295, BMGene13362, BMGene13594, BMGene13595, BMGene13794, BMGene13797, BMGene13911, BMGene14980, BMGene15289, BMGene15314, BMGene15315, BMGene15635, BMGene15981, BMGene15982, BMGene16290
OG0000431
OG0000441	BMGene05284, BMGene08014
OG0000442	BMGene04235, BMGene05707
OG0000452	BMGene11807, BMGene11860, BMGene11891, BMGene11915, BMGene12218, BMGene12554, BMGene12565, BMGene12865, BMGene12975, BMGene13123, BMGene13282, BMGene13579, BMGene14026, BMGene14147, BMGene14213, BMGene14254, BMGene14888, BMGene15121, BMGene15128, BMGene15156, BMGene15601, BMGene15739, BMGene15776, BMGene15871, BMGene15946
OG0000455	BMGene05377, BMGene07909
OG0000456	BMGene01716, BMGene11458, BMGene11613, BMGene12321, BMGene12396, BMGene13030, BMGene13576, BMGene13603, BMGene13618, BMGene13645, BMGene13695, BMGene13697, BMGene13698, BMGene13700, BMGene13801, BMGene14054, BMGene14274, BMGene14391, BMGene14577, BMGene14938, BMGene15100, BMGene15165, BMGene15240, BMGene15534, BMGene15638, BMGene15789, BMGene15985
OG0000460	BMGene00144, BMGene00762, BMGene10943, BMGene10944, BMGene12223, BMGene12224, BMGene13813, BMGene13988, BMGene16099
OG0000466	BMGene04076, BMGene05557
OG0000472	BMGene05314, BMGene07983
OG0000473	BMGene00186, BMGene00808
OG0000483	BMGene00121, BMGene00734
OG0000487	BMGene12319, BMGene12714, BMGene13524, BMGene14400
OG0000488	BMGene12364, BMGene13311, BMGene14491, BMGene14689, BMGene14846, BMGene15317
OG0000489	BMGene11600, BMGene11955, BMGene12758, BMGene13682, BMGene14035, BMGene14138, BMGene14139, BMGene14143, BMGene14175, BMGene14278, BMGene14827, BMGene14992, BMGene15889, BMGene16036, BMGene16078
OG0000491	BMGene09149, BMGene12505, BMGene12650, BMGene12699, BMGene12810, BMGene13883, BMGene14025, BMGene14074, BMGene14439, BMGene14686, BMGene14892, BMGene15098, BMGene15586
OG0000515	BMGene05092, BMGene08209, BMGene08211, BMGene08212
OG0000527	BMGene01330, BMGene11711, BMGene12204, BMGene13221, BMGene13569, BMGene13609, BMGene13897, BMGene13937, BMGene14006, BMGene14436, BMGene14762, BMGene14918, BMGene16192
OG0000539	BMGene01351, BMGene16138
OG0000560	BMGene04294, BMGene06094
OG0000563
OG0000568	BMGene00388, BMGene01015
OG0000572	BMGene01321, BMGene01334, BMGene11472, BMGene11475, BMGene11625, BMGene11677, BMGene11684, BMGene11761, BMGene11825, BMGene11844, BMGene12330, BMGene12651, BMGene12908, BMGene13121, BMGene13293, BMGene13338, BMGene13434, BMGene13535, BMGene13738, BMGene13944, BMGene14148, BMGene14311, BMGene14444, BMGene14939, BMGene14994, BMGene14997, BMGene15929, BMGene16087
OG0000576	BMGene04091, BMGene05575
OG0000585
OG0000607	BMGene12943, BMGene14544, BMGene14753, BMGene14883, BMGene15809
OG0000608	BMGene11629, BMGene11699, BMGene13422, BMGene15376
OG0000609	BMGene11623, BMGene15650
OG0000612	BMGene03120, BMGene16417
OG0000639	BMGene01618, BMGene02399
OG0000647	BMGene11646, BMGene11784, BMGene12179, BMGene12857, BMGene13233, BMGene13639, BMGene14232, BMGene14454, BMGene15202, BMGene15734, BMGene16139
OG0000651	BMGene01547, BMGene02329
OG0000653	BMGene11156, BMGene11157
OG0000701	BMGene05303, BMGene05304, BMGene07992
OG0000705	BMGene05053, BMGene05055, BMGene08243, BMGene08244, BMGene08246
OG0000707	BMGene02362, BMGene07461, BMGene08700, BMGene10776, BMGene11051, BMGene11337, BMGene12456, BMGene14342
OG0000714	BMGene00543, BMGene01155, BMGene02520, BMGene04392, BMGene06232, BMGene12485, BMGene12487, BMGene12557, BMGene12958, BMGene12959, BMGene13014, BMGene13067, BMGene13284, BMGene13987, BMGene15769, BMGene16237
OG0000718	BMGene06377, BMGene14681, BMGene15455, BMGene15518, BMGene15799, BMGene15936, BMGene16128, BMGene16159
OG0000740	BMGene00534, BMGene01188
OG0000744	BMGene00701, BMGene11124
OG0000746	BMGene09154, BMGene15227
OG0000775	BMGene00155, BMGene00776
OG0000800	BMGene06641
OG0000805	BMGene03200, BMGene08342
OG0000833	BMGene05031, BMGene08268, BMGene08269
OG0000846	BMGene01473, BMGene02249
OG0000855	BMGene04305, BMGene05771
OG0000858	BMGene00148, BMGene00767
OG0000866	BMGene10690
OG0000870
OG0000872	BMGene04088, BMGene05572
OG0000880	BMGene01710, BMGene02502, BMGene04812, BMGene11675, BMGene12182, BMGene12660, BMGene13397, BMGene13539, BMGene13653, BMGene14510, BMGene14663, BMGene14857, BMGene14901, BMGene15237, BMGene15352, BMGene15439, BMGene15457, BMGene16132
OG0000882
OG0000925	BMGene04508, BMGene06339
OG0000936	BMGene07979
OG0000945	BMGene00436, BMGene11325
OG0000951	BMGene04160, BMGene05635
OG0000956	BMGene03419, BMGene14644
OG0000959	BMGene00109, BMGene00717
OG0000970	BMGene09151, BMGene11581, BMGene12724, BMGene12949, BMGene13227, BMGene13727, BMGene13975, BMGene14304
OG0000971	BMGene01342, BMGene01715, BMGene02503, BMGene06379, BMGene11690, BMGene11759, BMGene11771, BMGene12795, BMGene13314, BMGene13518, BMGene13929, BMGene13930, BMGene14019, BMGene14207, BMGene14224, BMGene14225, BMGene14295, BMGene14509, BMGene14596, BMGene15692
OG0000972	BMGene09148, BMGene11582, BMGene12220, BMGene12398, BMGene13382, BMGene13555, BMGene13800, BMGene13955, BMGene14215, BMGene14360, BMGene14622, BMGene15122, BMGene15412, BMGene15566, BMGene16243, BMGene16293
OG0000977	BMGene11767, BMGene12378, BMGene12388, BMGene12755, BMGene12789, BMGene12866, BMGene12920, BMGene12951, BMGene13196, BMGene13219, BMGene13400, BMGene13678, BMGene14243, BMGene14276, BMGene14521, BMGene14706, BMGene14861, BMGene14920, BMGene14947, BMGene15002, BMGene15003, BMGene15366, BMGene15937, BMGene15992, BMGene16034
OG0001005	BMGene04223, BMGene05695
OG0001034
OG0001064	BMGene00405, BMGene01036
OG0001069	BMGene02691, BMGene02692, BMGene02863, BMGene06801, BMGene06802
OG0001075	BMGene12393, BMGene14423
OG0001076	BMGene12544, BMGene14237, BMGene14545
OG0001109	BMGene05036, BMGene08265
OG0001116	BMGene11962, BMGene13244, BMGene13705, BMGene14013, BMGene14182, BMGene15030, BMGene15059, BMGene15085, BMGene15125, BMGene15512, BMGene16296
OG0001130
OG0001146	BMGene00428, BMGene01073, BMGene11331
OG0001165	BMGene01063, BMGene03036, BMGene03624, BMGene09160, BMGene11854, BMGene12329, BMGene13003, BMGene13090, BMGene13904, BMGene14037, BMGene14952, BMGene15513, BMGene15972
OG0001181	BMGene00537, BMGene00538, BMGene00539, BMGene01190
OG0001188	BMGene05477, BMGene07809
OG0001198	BMGene02727, BMGene16222
OG0001211	BMGene04479, BMGene06319, BMGene15700
OG0001221	BMGene01318, BMGene06994, BMGene13418, BMGene13689, BMGene14631, BMGene15595, BMGene15795, BMGene16021, BMGene16127, BMGene16213
OG0001223	BMGene05479, BMGene07808
OG0001248	BMGene13093, BMGene15143
OG0001260	BMGene00135, BMGene00752
OG0001276	BMGene12260, BMGene12302, BMGene12308, BMGene12495, BMGene12723, BMGene13966, BMGene14305, BMGene14977, BMGene15327, BMGene15401, BMGene15405, BMGene15479, BMGene15532
OG0001283	BMGene01348, BMGene11692, BMGene14876, BMGene14896, BMGene15477, BMGene15530
OG0001287	BMGene11963, BMGene14015, BMGene14259, BMGene14531, BMGene15054, BMGene15312, BMGene15614, BMGene16003
OG0001294	BMGene01356, BMGene02405, BMGene03648, BMGene06373, BMGene12701, BMGene13072, BMGene13098, BMGene13118, BMGene13373, BMGene13785, BMGene13974, BMGene14451, BMGene14498, BMGene14867, BMGene15134, BMGene15188, BMGene15207, BMGene15441
OG0001296	BMGene03058, BMGene12833, BMGene12881, BMGene13864, BMGene13868, BMGene13963, BMGene14069, BMGene14419, BMGene15329, BMGene15611
OG0001306	BMGene02968
OG0001315	BMGene05404, BMGene07876
OG0001331	BMGene07025, BMGene07431, BMGene07432, BMGene07434, BMGene07435, BMGene07436, BMGene07437, BMGene07438, BMGene07439, BMGene07440, BMGene07441, BMGene07442
OG0001380
OG0001393	BMGene00643, BMGene01292
OG0001401	BMGene04477, BMGene06317, BMGene15702
OG0001423	BMGene03677, BMGene13116, BMGene13588, BMGene13784, BMGene13903, BMGene14653, BMGene15685
OG0001438	BMGene12333, BMGene13631, BMGene13995
OG0001441	BMGene12226, BMGene12227, BMGene12408, BMGene12732, BMGene13169, BMGene13170, BMGene13181, BMGene13572, BMGene13706, BMGene14142, BMGene14284, BMGene14367, BMGene14530, BMGene14782, BMGene15316, BMGene15613, BMGene15967, BMGene15978
OG0001442	BMGene11589, BMGene11598, BMGene11620, BMGene13540, BMGene15295, BMGene15899
OG0001460	BMGene00251, BMGene00880
OG0001528	BMGene08839, BMGene14969, BMGene16251
OG0001531	BMGene06751, BMGene06752
OG0001575	BMGene05078, BMGene08226, BMGene08227, BMGene08228
OG0001604	BMGene00437, BMGene01081, BMGene11324
OG0001613	BMGene01337, BMGene12399, BMGene12698, BMGene12871, BMGene12913, BMGene13160, BMGene13396, BMGene14879, BMGene15541, BMGene15790, BMGene15895
OG0001616	BMGene12788, BMGene13172, BMGene13186, BMGene13360, BMGene13363, BMGene13549, BMGene13584, BMGene14408, BMGene14484, BMGene15506
OG0001617	BMGene12797, BMGene13651, BMGene13759, BMGene14068, BMGene14164, BMGene14238, BMGene14239, BMGene14504, BMGene14566, BMGene14685, BMGene15050, BMGene15200, BMGene16047, BMGene16272
OG0001620	BMGene09146, BMGene11451, BMGene12421, BMGene12472, BMGene14001, BMGene14268, BMGene14536, BMGene14780, BMGene14865, BMGene14950, BMGene15307, BMGene15358, BMGene15674, BMGene15722, BMGene15759
OG0001621	BMGene11449, BMGene14974, BMGene15172, BMGene15173, BMGene15578, BMGene15579, BMGene15581, BMGene15697, BMGene15698, BMGene15902, BMGene15934, BMGene15962, BMGene15965, BMGene16009, BMGene16064, BMGene16066, BMGene16068, BMGene16094, BMGene16124, BMGene16264, BMGene16291
OG0001623
OG0001628	BMGene03903
OG0001660	BMGene03742, BMGene03743, BMGene03745, BMGene07089
OG0001716	BMGene10671
OG0001738	BMGene00434, BMGene01079
OG0001767
OG0001769	BMGene09162, BMGene12852, BMGene14122, BMGene14129, BMGene14307, BMGene14856, BMGene14976, BMGene15091, BMGene15591, BMGene15592, BMGene15630
OG0001774	BMGene12488, BMGene12489, BMGene12957, BMGene13013, BMGene13015, BMGene13068, BMGene13782, BMGene14030, BMGene15726, BMGene15768, BMGene15997, BMGene16166, BMGene16236
OG0001794	BMGene12798, BMGene14165, BMGene16274
OG0001796	BMGene02603, BMGene09166, BMGene12676, BMGene12968, BMGene13152, BMGene13379, BMGene14605, BMGene16170
OG0001798	BMGene03627, BMGene12178, BMGene12725, BMGene12971, BMGene13066, BMGene13286, BMGene13557, BMGene13928, BMGene14185, BMGene14538, BMGene14617, BMGene14618, BMGene14815, BMGene15686, BMGene15804, BMGene15819, BMGene15846, BMGene16001
OG0001802	BMGene09179, BMGene09188, BMGene13005, BMGene15205
OG0001803	BMGene11778, BMGene12314, BMGene12930, BMGene13366, BMGene14062, BMGene14152, BMGene15014, BMGene15440, BMGene15715, BMGene15860
OG0001804	BMGene09191, BMGene11569, BMGene11608, BMGene13612, BMGene14055, BMGene14960, BMGene14961, BMGene15225, BMGene15567, BMGene15568, BMGene15628, BMGene16079, BMGene16120, BMGene16161, BMGene16179, BMGene16283
OG0001805	BMGene06380, BMGene12272
OG0001817
OG0001855
OG0001912	BMGene09185, BMGene11685, BMGene11762, BMGene12702, BMGene12816, BMGene14070, BMGene14805, BMGene15020, BMGene15487
OG0001952	BMGene12390, BMGene13306, BMGene13976, BMGene14624, BMGene14726, BMGene14791, BMGene15049, BMGene15224, BMGene16030, BMGene16186
OG0001991
OG0001992	BMGene03235, BMGene13430
OG0001993
OG0002023	BMGene12409, BMGene12412, BMGene12415, BMGene13711, BMGene13712, BMGene14214, BMGene14364, BMGene14793, BMGene15810, BMGene16163
OG0002044	BMGene00252, BMGene00882
OG0002074	BMGene05112, BMGene08191
OG0002184	BMGene00358, BMGene00985
OG0002189	BMGene00110, BMGene00718
OG0002223	BMGene08915, BMGene08916
OG0002233	BMGene02855, BMGene02913, BMGene09184, BMGene11870, BMGene12665, BMGene13722, BMGene14233, BMGene15110, BMGene15998
OG0002239	BMGene04471, BMGene06312
OG0002240	BMGene01584, BMGene02365
OG0002243	BMGene00237, BMGene00864, BMGene16497
OG0002263	BMGene12568, BMGene13819, BMGene14817, BMGene15179, BMGene15360
OG0002264	BMGene11463, BMGene13393, BMGene14429, BMGene14761, BMGene15490
OG0002273	BMGene04774
OG0002277	BMGene13781, BMGene15731
OG0002278	BMGene01358, BMGene02375, BMGene11668, BMGene12418, BMGene12513, BMGene12836, BMGene13421, BMGene14065, BMGene14071, BMGene14191, BMGene14407, BMGene14561, BMGene14661, BMGene15571
OG0002501	BMGene05318, BMGene07977
OG0002523	BMGene04405, BMGene06246
OG0002541	BMGene11603, BMGene12200, BMGene12423, BMGene12826, BMGene13129, BMGene13509, BMGene13945, BMGene14418, BMGene15034, BMGene16091
OG0002545	BMGene11823, BMGene11845, BMGene12336, BMGene12420, BMGene12635, BMGene14000, BMGene14766, BMGene15097, BMGene16224
OG0002547	BMGene03657, BMGene06508, BMGene11790, BMGene11879, BMGene12211, BMGene12942, BMGene13296, BMGene13614, BMGene13809, BMGene14383, BMGene14674, BMGene14890, BMGene15073, BMGene15384
OG0002550	BMGene05190, BMGene08118
OG0002551	BMGene12190, BMGene13620
OG0002552	BMGene12417, BMGene13596, BMGene13788, BMGene14487, BMGene14677, BMGene14962, BMGene15066, BMGene15349, BMGene15724, BMGene15761, BMGene16083
OG0002553	BMGene05878
OG0002577	BMGene04162, BMGene05638
OG0002583	BMGene00308, BMGene00309, BMGene00933
OG0002627	BMGene05317, BMGene07980
OG0002650	BMGene00669, BMGene11150
OG0002722	BMGene00292, BMGene00921
OG0002766	BMGene01339, BMGene06370, BMGene09139, BMGene12307, BMGene12872, BMGene13374, BMGene13561, BMGene13623, BMGene13635, BMGene14130, BMGene14608, BMGene15075, BMGene15228, BMGene15285, BMGene15836
OG0002786	BMGene11957, BMGene15147, BMGene15471, BMGene15472, BMGene15893, BMGene16007, BMGene16028
OG0002882	BMGene11695, BMGene13380, BMGene14252, BMGene15105, BMGene15443, BMGene16173, BMGene16273
OG0002883
OG0002885	BMGene11883, BMGene13652, BMGene14468, BMGene14560, BMGene15210, BMGene15368, BMGene15865
OG0002887
OG0002888	BMGene06371, BMGene09212, BMGene11633, BMGene11648, BMGene11951, BMGene12733, BMGene12781, BMGene12947, BMGene13034, BMGene13508, BMGene13744, BMGene14372, BMGene14872, BMGene15521, BMGene15949
OG0003242	BMGene00979, BMGene11468, BMGene11688, BMGene11797, BMGene11852, BMGene12454, BMGene12498, BMGene12576, BMGene12823, BMGene13006, BMGene13368, BMGene14684, BMGene15516
OG0003308	BMGene04975, BMGene08338
OG0003322
OG0003329	BMGene13534, BMGene15301
OG0003343	BMGene00545, BMGene01194
OG0003490	BMGene13074, BMGene13748, BMGene14081, BMGene14195, BMGene14499, BMGene14807, BMGene15019
OG0003525	BMGene02426, BMGene02427
OG0003711	BMGene12475, BMGene12767, BMGene12842, BMGene13390, BMGene14797, BMGene15112, BMGene15420
OG0003845	BMGene11464, BMGene11474, BMGene13120, BMGene13432, BMGene14156, BMGene14443, BMGene14449, BMGene14941, BMGene15168
OG0004481	BMGene03652, BMGene12353, BMGene13045, BMGene13192, BMGene13851, BMGene13905, BMGene13984, BMGene15977
OG0004484	BMGene09135, BMGene09143, BMGene11775
OG0004488	BMGene11826, BMGene11843, BMGene12731, BMGene12820
OG0004490	BMGene10677
OG0004639
OG0004789
OG0005284	BMGene14078, BMGene14579, BMGene15096
OG0005289	BMGene04161, BMGene05637
OG0005300	BMGene01323, BMGene11770, BMGene12673, BMGene12696, BMGene12708, BMGene15403
OG0005303	BMGene01743, BMGene12175, BMGene12503, BMGene13575, BMGene14416, BMGene14549, BMGene15361
OG0005305	BMGene03643, BMGene15346
OG0005306	BMGene00516, BMGene01171, BMGene03035, BMGene06831, BMGene13367, BMGene13948
OG0005849	BMGene11656, BMGene12752, BMGene12940, BMGene13313, BMGene13343, BMGene14121, BMGene14698, BMGene14802, BMGene15409, BMGene15421
OG0005856	BMGene11864, BMGene14088, BMGene15370
OG0006300	BMGene11624, BMGene12869, BMGene13943
OG0006314	BMGene13350, BMGene15491
OG0006315	BMGene12786, BMGene13728
OG0006316	BMGene11816, BMGene12976, BMGene12991, BMGene13723, BMGene14024, BMGene14235, BMGene14250, BMGene14293, BMGene14810, BMGene14841
OG0006320	BMGene12199, BMGene12291, BMGene13647, BMGene13949, BMGene14162, BMGene14392, BMGene14415, BMGene14804, BMGene15345, BMGene16048
OG0007207
OG0007477
OG0007480
OG0007487	BMGene02498, BMGene13330, BMGene13347, BMGene13399, BMGene14512
OG0007490	BMGene12275, BMGene13544, BMGene14109, BMGene14703, BMGene14855, BMGene15214, BMGene15369
OG0007492	BMGene14453, BMGene15840, BMGene16280
OG0007493	BMGene12719, BMGene12790, BMGene14004, BMGene15928, BMGene16035
OG0007494
OG0008426	BMGene01329, BMGene11607, BMGene14803, BMGene16093
OG0008457
OG0008463
OG0008749	BMGene13344, BMGene13932, BMGene14783
OG0008943	BMGene01327, BMGene10773, BMGene14027, BMGene14595, BMGene14999, BMGene15535
OG0008953	BMGene05470, BMGene08314
OG0008955	BMGene00663, BMGene01678, BMGene11573, BMGene12381, BMGene13662, BMGene13815, BMGene14834, BMGene14984
OG0008980	BMGene01735, BMGene11905
OG0008983	BMGene11788, BMGene11878, BMGene14209, BMGene16102, BMGene16287
OG0008992	BMGene12494, BMGene13646, BMGene13667, BMGene14358, BMGene14978, BMGene15533, BMGene15684
OG0008995	BMGene11798, BMGene11853, BMGene12527, BMGene13514, BMGene15833, BMGene16073
OG0008997	BMGene12368, BMGene12555, BMGene12770, BMGene14255, BMGene15710, BMGene15775
OG0009001	BMGene11665, BMGene12400, BMGene12859, BMGene12922, BMGene13538, BMGene14569, BMGene15676, BMGene15764, BMGene15984
OG0009016	BMGene00967, BMGene03619, BMGene07159, BMGene07802, BMGene07894, BMGene12535, BMGene14011
OG0009062	BMGene00323, BMGene00946
OG0009240	BMGene04460, BMGene06300
OG0009337
OG0009339	BMGene12932, BMGene13200, BMGene14630, BMGene15796
OG0009365	BMGene01729, BMGene02509, BMGene06374, BMGene13562, BMGene14790, BMGene15604, BMGene15647
OG0009374	BMGene12508, BMGene12534, BMGene13214, BMGene14131, BMGene14133, BMGene15267
OG0009381	BMGene11709, BMGene12240, BMGene13109
OG0009383	BMGene01725, BMGene15643
OG0009384	BMGene09164, BMGene12799, BMGene13982, BMGene14112
OG0009388	BMGene15741, BMGene15779
OG0009394	BMGene11694, BMGene11777, BMGene12911, BMGene14313
OG0009395	BMGene12427, BMGene13512, BMGene14208, BMGene14723, BMGene15742, BMGene15941
OG0009398	BMGene01328, BMGene03647, BMGene11476, BMGene11680, BMGene12659, BMGene13429, BMGene15126
OG0009399	BMGene10774, BMGene13947, BMGene14017, BMGene14863, BMGene15212, BMGene15410, BMGene15448, BMGene15536
OG0009648	BMGene04918, BMGene12569
OG0009660	BMGene12541, BMGene16042
OG0009673	BMGene12540, BMGene12561, BMGene15694, BMGene15879, BMGene16111
OG0009681	BMGene03621, BMGene03625, BMGene03630, BMGene03632, BMGene13616
OG0009682	BMGene11908, BMGene13724, BMGene13732, BMGene13956
OG0009690	BMGene13590, BMGene14092, BMGene14298, BMGene14989, BMGene15297, BMGene15325
OG0009940	BMGene11884, BMGene15740, BMGene15943
OG0009942	BMGene13687, BMGene14720
OG0009980	BMGene12654, BMGene12756, BMGene13999, BMGene15313, BMGene15572, BMGene15954
OG0009981	BMGene12695, BMGene13062, BMGene13084, BMGene13758, BMGene14874, BMGene15365
OG0010261	BMGene05453, BMGene07827
OG0010269	BMGene12935, BMGene14279, BMGene15842, BMGene16098
OG0010663	BMGene12737, BMGene13753
